# Supplementary material for: Two New Alkaloids and a New Butenolide Derivative from the Beibu Gulf Sponge-Derived Fungus Penicillium sp. SCSIO 41413
Source: MDPI journal article supplement (doi:10.3390/md21010027), 2022-12-29
Supplement: s1 [file s1]

## SUPPLEMENTARY MATERIAL

# Two new alkaloids and a new butenolide derivative from the Beibu Gulf sponge-derived fungus *Penicillium* sp. SCSIO 41413

Yuxiu Ye<sup>1</sup>, Jiaqi Liang<sup>2</sup>, Jianglian She<sup>2</sup>, Xiuping Lin<sup>2</sup>, Junfeng Wang<sup>2</sup>, Yonghong Liu<sup>1,2</sup>, Dehua Yang<sup>3</sup>, Yanhui Tan<sup>4,\*</sup>, Xiaowei Luo<sup>1,\*</sup>, Xuefeng Zhou<sup>1,2,\*</sup>

1 Institute of Marine Drugs, Guangxi University of Chinese Medicine, Nanning 530200, China;

2 CAS Key Laboratory of Tropical Marine Bio-resources and Ecology/Guangdong Key Laboratory of Marine Materia Medica, South China Sea Institute of Oceanology, Chinese Academy of Sciences, Guangzhou 510301, China;

3 The National Center for Drug Screening, Shanghai Institute of Materia Medica, Chinese Academy of Sciences, Shanghai 201203, China;

4 State Key Laboratory for Chemistry and Molecular Engineering of Medicinal Resources, School of Chemistry and Pharmaceutical Sciences, Guangxi Normal University, Guilin 541001, China

\* Correspondence: tyh533@126.com (Y.T.); luoxiaowei1991@126.com (X.L.); xfzhou@scsio.ac.cn (X.Z.); Tel.: +86-020-89023174 (X.Z.)

**Abstract:** Marine sponge-derived fungi have been proven to be a prolific source of bioactive natural products. Two new alkaloids, polonimides E (**1**) and D (**2**), and a new butenolide derivative, eutypoid F (**11**), were isolated from the Beibu Gulf sponge-derived fungus, *Penicillium* sp. SCSIO 41413, together with thirteen known compounds (**3–10**, **12–16**). Their structures were determined by detailed NMR, MS spectroscopic analyses, and electronic circular dichroism (ECD) analyses. Butenolide derivatives **11** and **12** exhibited inhibitory effect against the enzyme PI3K with IC<sub>50</sub> values of 1.7  $\mu$ M and 9.8  $\mu$ M, respectively. The molecular docking was also performed to understand the inhibitory activity, while **11** and **12** showed obvious protein/ligand-binding effects to the PI3K protein. Moreover, **4** and **15** displayed obvious inhibitory activity against LPS-induced NF- $\kappa$ B activation in RAW264.7 cells at 10  $\mu$ M.

**Keywords:** Sponge-derived fungus; *Penicillium* sp.; PI3K; NF- $\kappa$ B

## Contents

The ITS gene sequence data of *Penicillium* sp. SCSIO 41413

Figure S1. The  $^1\text{H}$  NMR spectrum of compound 1 in DMSO.

Figure S2. The  $^{13}\text{C}$  NMR spectrum of compound 1 in DMSO.

Figure S3. The HSQC spectrum of compound 1 in DMSO.

Figure S4. The HMBC spectrum of compound 1 in DMSO.

Figure S5. The  $^1\text{H}$ - $^1\text{H}$  COSY spectrum of compound 1 in DMSO.

Figure S6. The HRESIMS spectrum of compound 1 in DMSO.

Figure S7. The IR spectrum of compound 1 in DMSO.

Figure S8. The UV and ECD spectrum of compound 1 in DMSO.

Figure S9. The experimental ECD spectrum of compound 1.

Figure S10. The  $^1\text{H}$  NMR spectrum of compound 2 in DMSO.

Figure S11. The  $^{13}\text{C}$  NMR spectrum of compound 2 in DMSO.

Figure S12. The HSQC spectrum of compound 2 in DMSO.

Figure S13. The HMBC spectrum of compound 2 in DMSO.

Figure S14. The  $^1\text{H}$ - $^1\text{H}$  COSY spectrum of compound 2 in DMSO.

Figure S15. The HRESIMS spectrum of compound 2 in DMSO.

Figure S16. The IR spectrum of compound 2 in DMSO.

Figure S17. The UV spectrum of compound 2 in DMSO.

Figure S18. The  $^1\text{H}$  NMR spectrum of compound 11 in DMSO.

Figure S19. The  $^{13}\text{C}$  NMR spectrum of compound 11 in DMSO.

Figure S20. The HSQC spectrum of compound 11 in DMSO.

Figure S21. The HMBC spectrum of compound 11 in DMSO.

Figure S22. The  $^1\text{H}$ - $^1\text{H}$  COSY spectrum of compound 11 in DMSO.

Figure S23. The HRESIMS spectrum of compound 11 in DMSO.

Figure S24. The IR spectrum of compound 11 in DMSO.

Figure S25. The UV spectrum of compound 11 in DMSO.

Figure S26. The experimental ECD spectrum of compound 12 in DMSO.

The physicochemical data of the known compounds 3~10 and 12~16

GATATGCTTAAGTTCAGCGGGTATCCCTACCTGATCCGAGGTCAACCTGGATAAAAATT  
TGGGTTGATCGGCAAGCGCCGGCCGGGCCTACAGAGCGGGTGACAAAGCCCCATACG  
CTCGAGGACCGGACGCGGTGCCGCCGCTGCCTTTTCGGGCCCCTCCCCCGGAATCGGA  
GGACGGGGGCCCAACACACAAGCCGGGCTTGAGGGGCAGCAATGACGCTCGGACAGGC  
ATGCCCCCGGAATACCAGGGGGCGCAATGTGCGTTCAAAGACTCGATGATTCACTGA  
ATTTGCAATTACATTACGTATCGCATTTTCGCTGCGTTCTTCATCGATGCCGGAACCAAG  
AGATCCGTTGTTGAAAGTTTTAAATAATTTATATTTTCACTCAGACTTCAATCTTCAGAC  
AGAGTTCGGGGGTGTCTTCGGCGGGCGCGGGCCCCGGGGGCGTGAGCCCCCGGCGGC  
CAGTAAAGGCGGGCCCCGCCGAAGCAACAAGGTAAAATAAACACGGGTGGGAGGTTGG  
ACCCAAAGGGCCCTCACTCGGTAATGATCCTTCCGCA

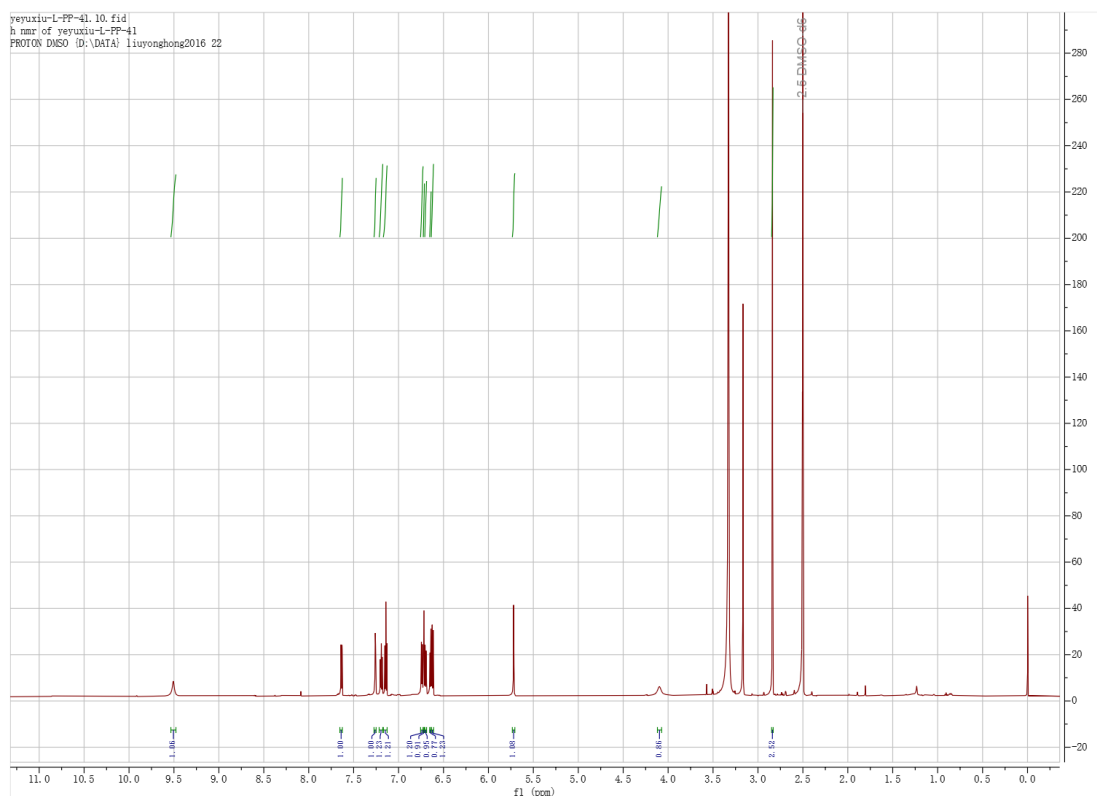

**Figure S1. The  $^1\text{H}$  NMR spectrum of compound 1 in DMSO.**

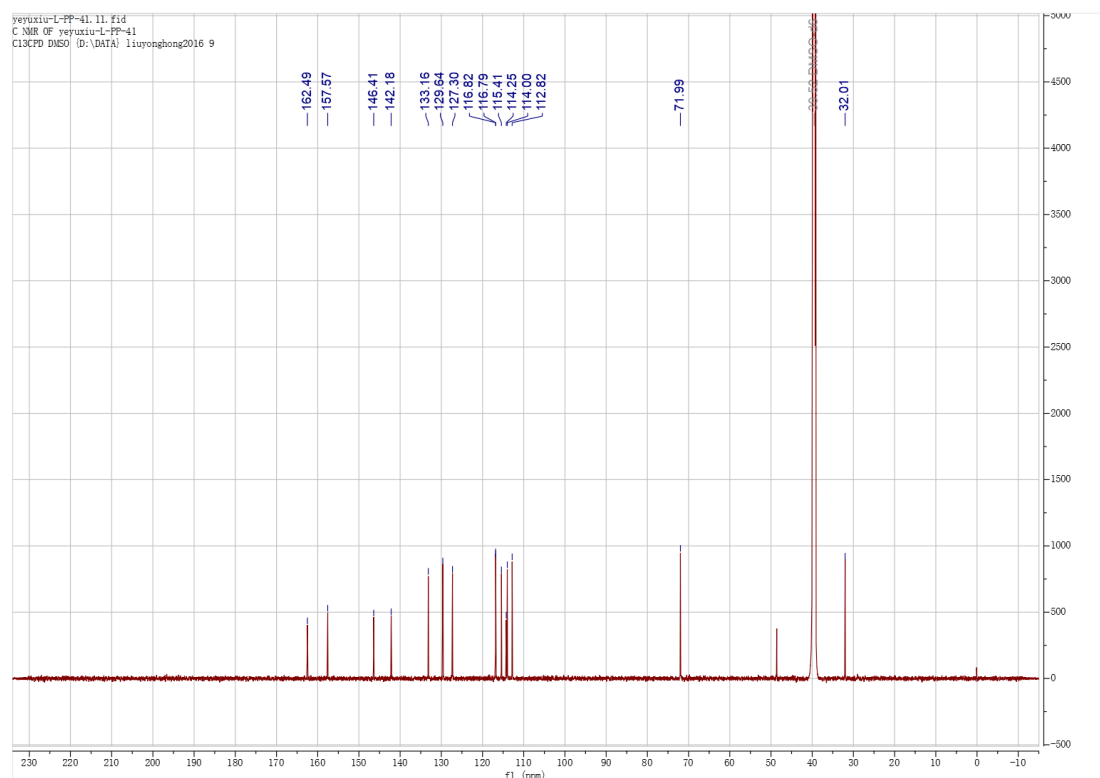

**Figure S2. The  $^{13}\text{C}$  NMR spectrum of compound 1 in DMSO.**

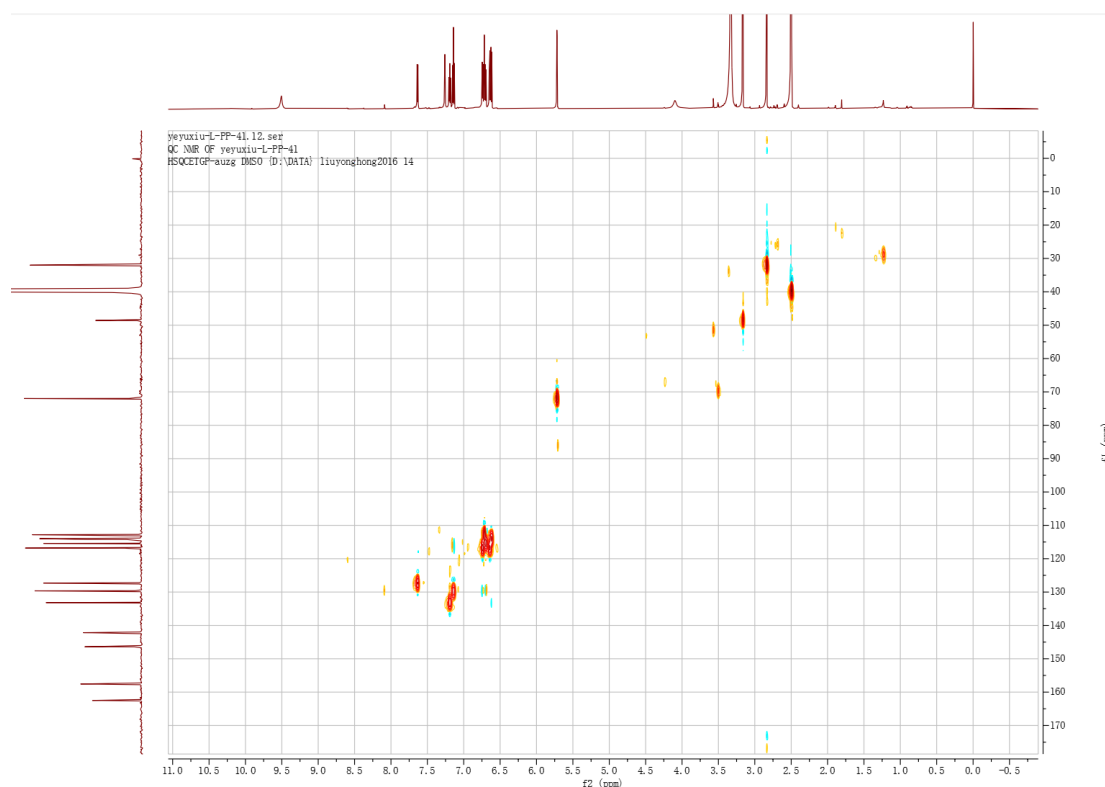

**Figure S3. The HSQC spectrum of compound 1 in DMSO.**

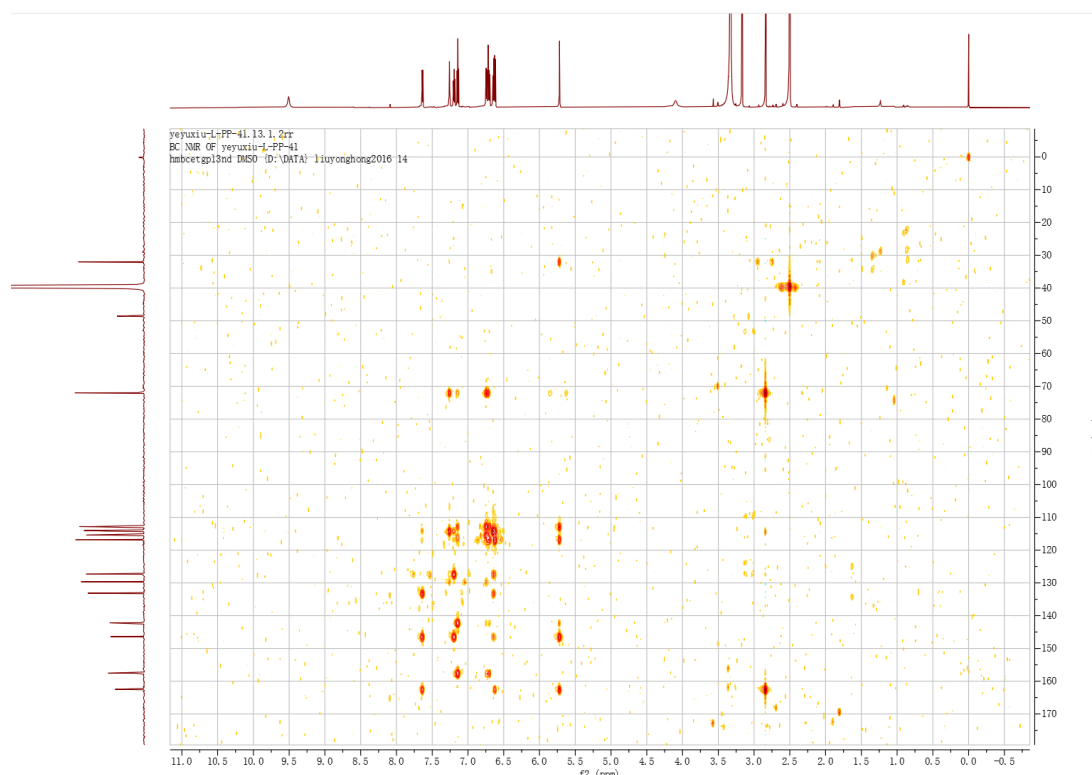

**Figure S4. The HMBC spectrum of compound 1 in DMSO.**

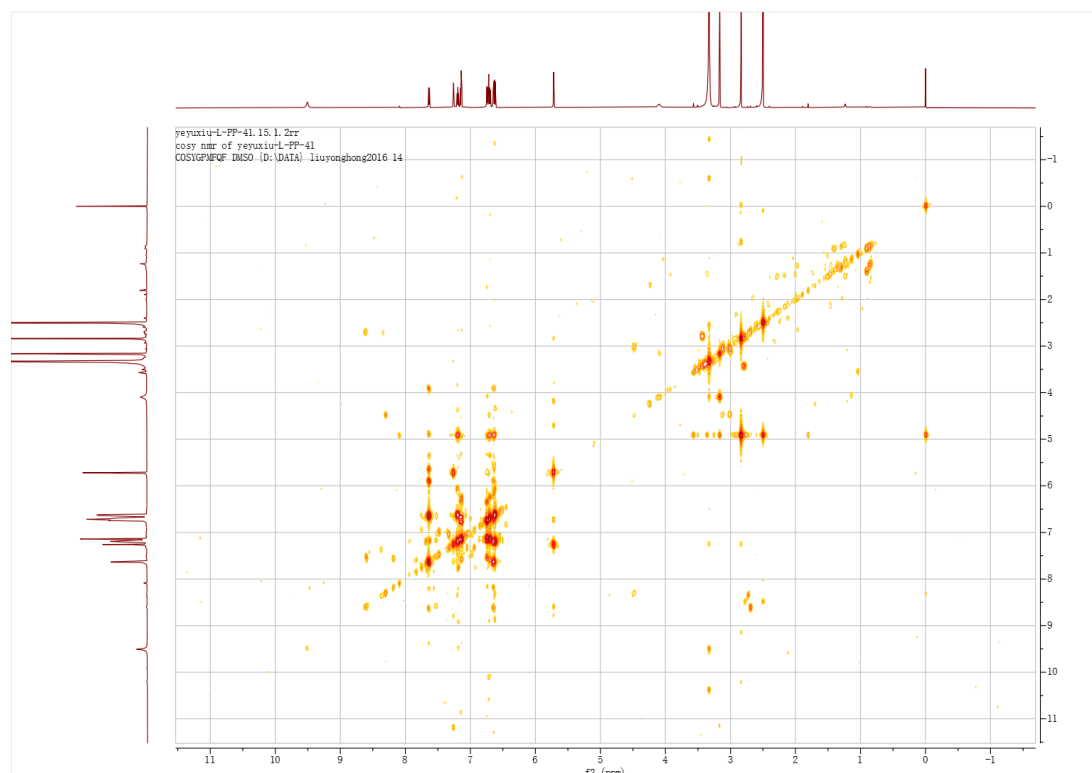

**Figure S5. The  $^1\text{H}$ - $^1\text{H}$  COSY spectrum of compound 1 in DMSO.**

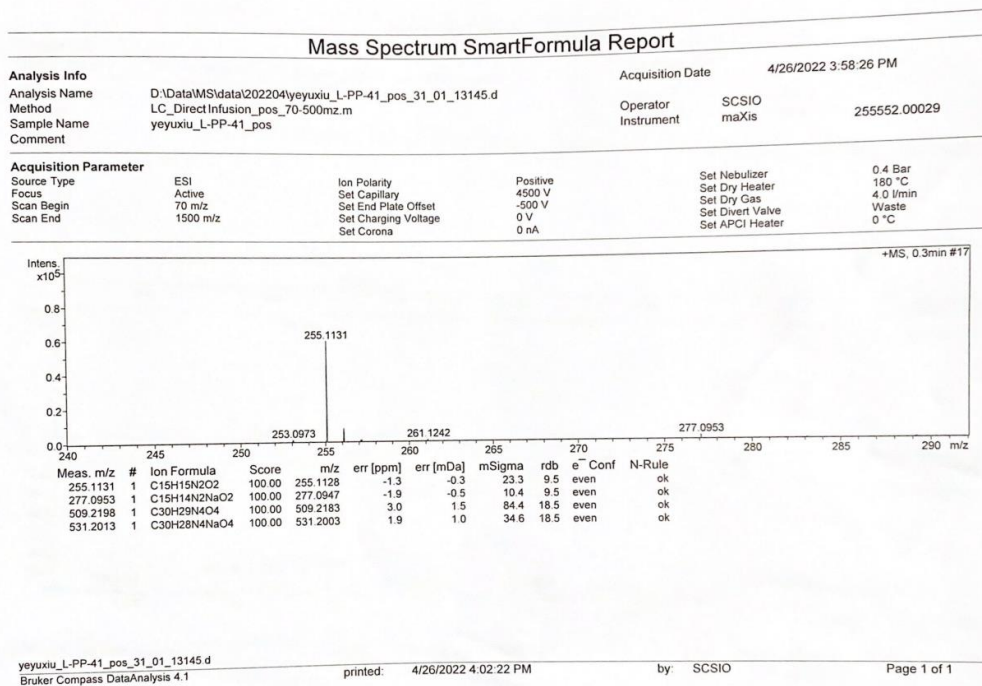

**Figure S6. The HRESIMS spectrum of compound 1 in DMSO.**

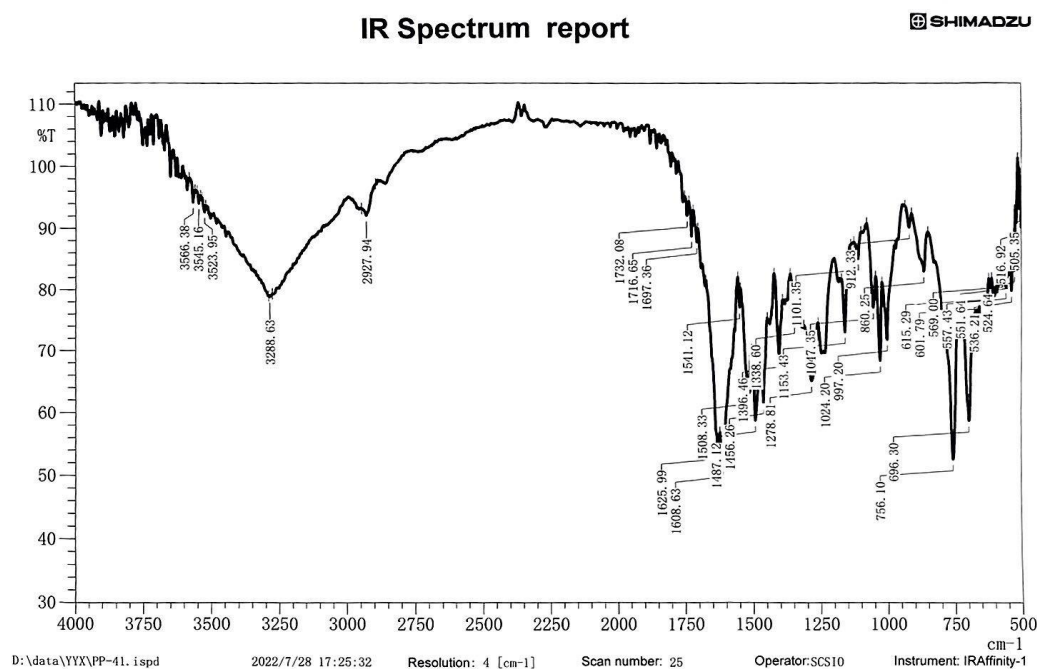

**Figure S7. The IR spectrum of compound 1 in DMSO.**

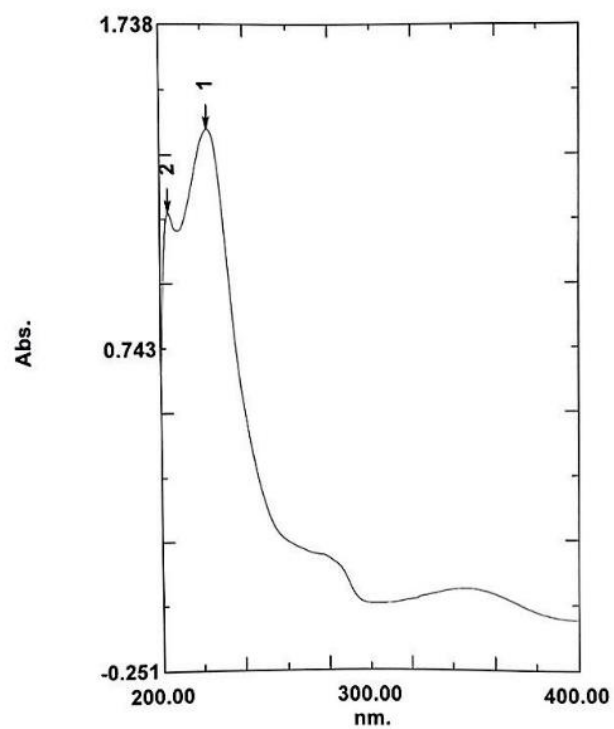

**Figure S8. The UV spectrum of compound 1 in DMSO.**

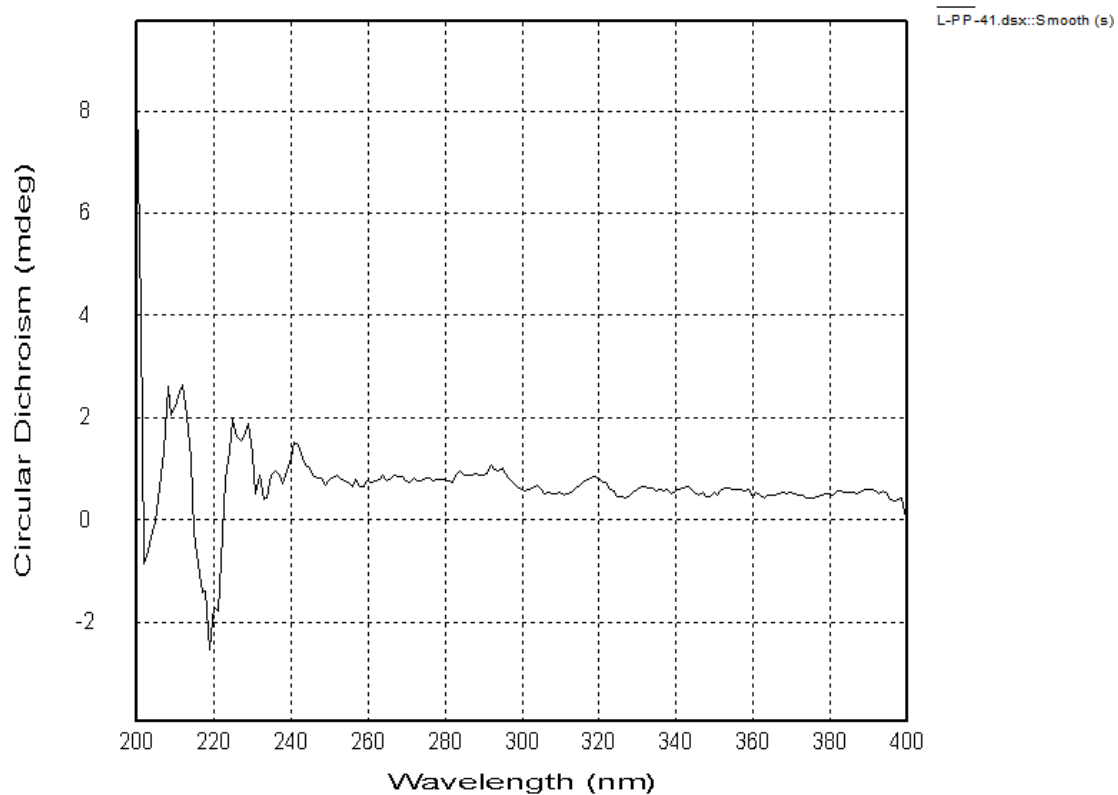

**Figure S9. The experimental ECD spectrum of compound 1.**

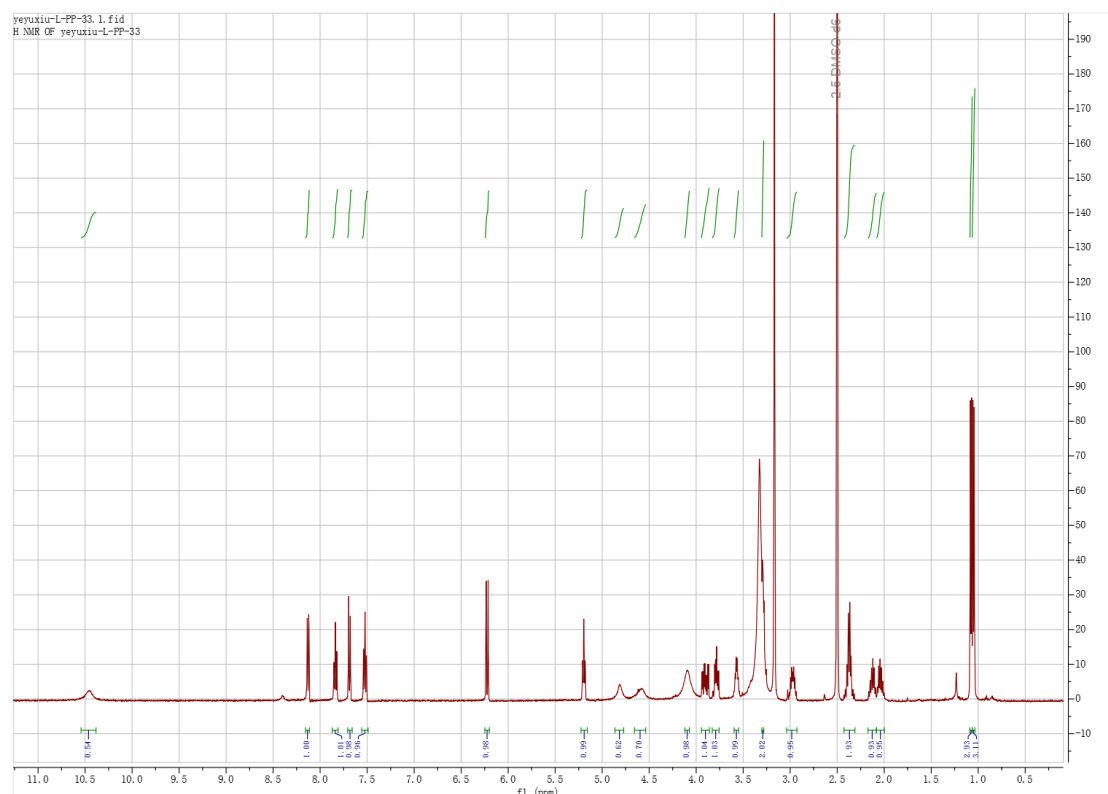

**Figure S10. The  $^1\text{H}$  NMR spectrum of compound 2 in DMSO.**

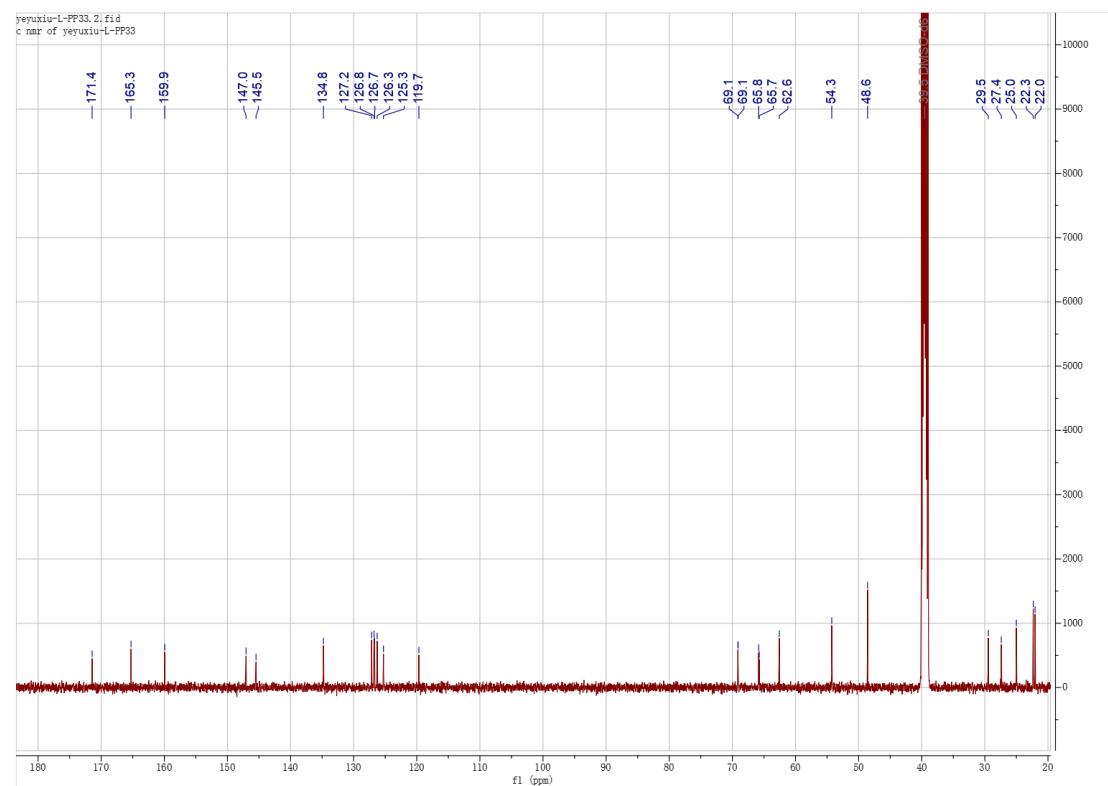

**Figure S11. The  $^{13}\text{C}$  NMR spectrum of compound 2 in DMSO.**



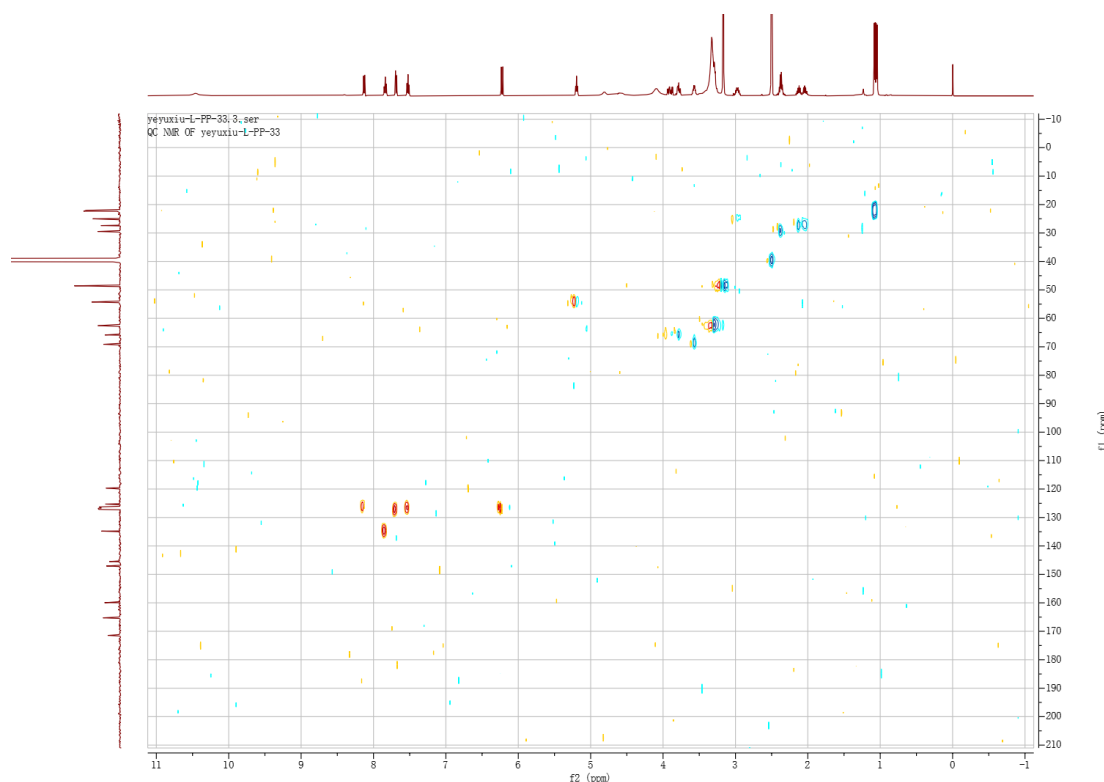

**Figure S12. The HSQC spectrum of compound 2 in DMSO.**

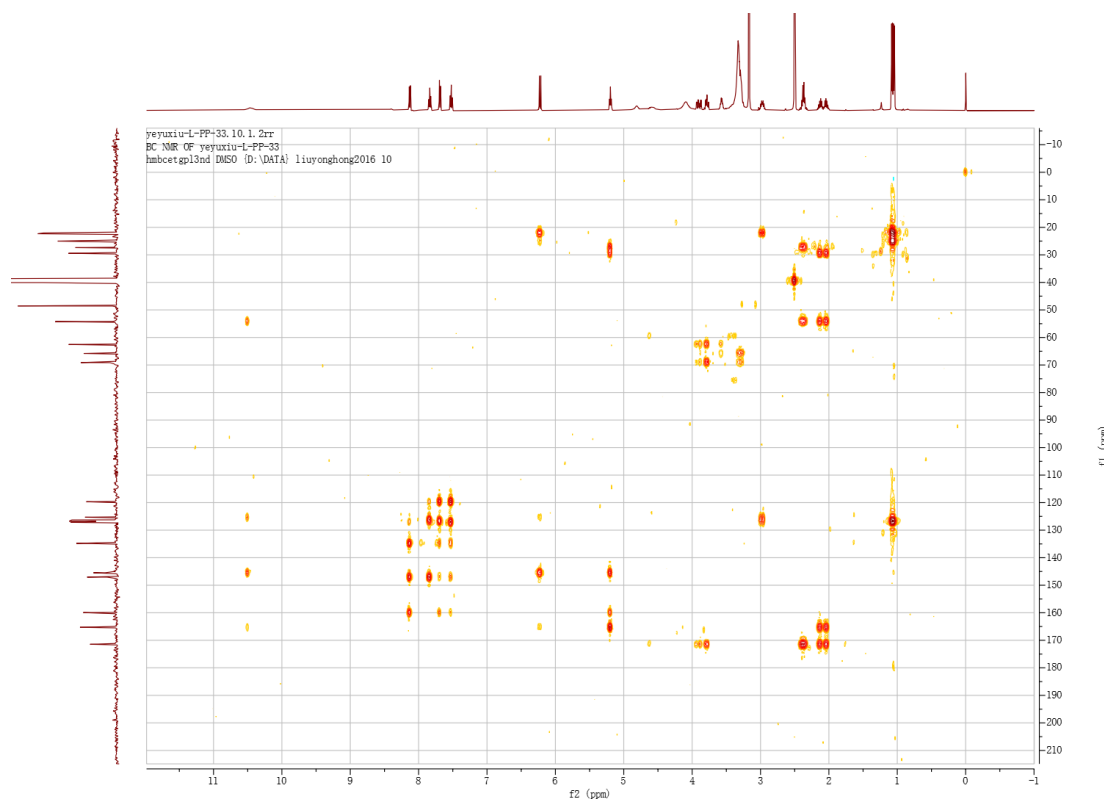

**Figure S13. The HMBC spectrum of compound 2 in DMSO.**

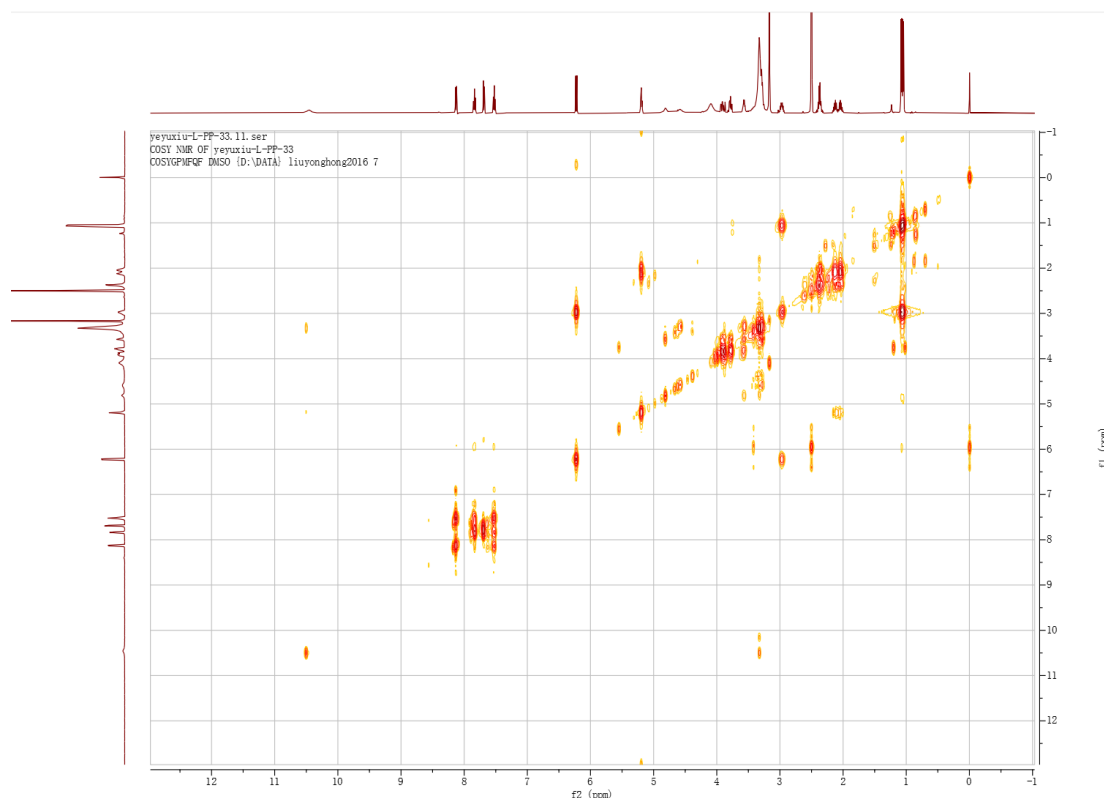

**Figure S14.** The  $^1\text{H}$ - $^1\text{H}$  COSY spectrum of compound 2 in DMSO.

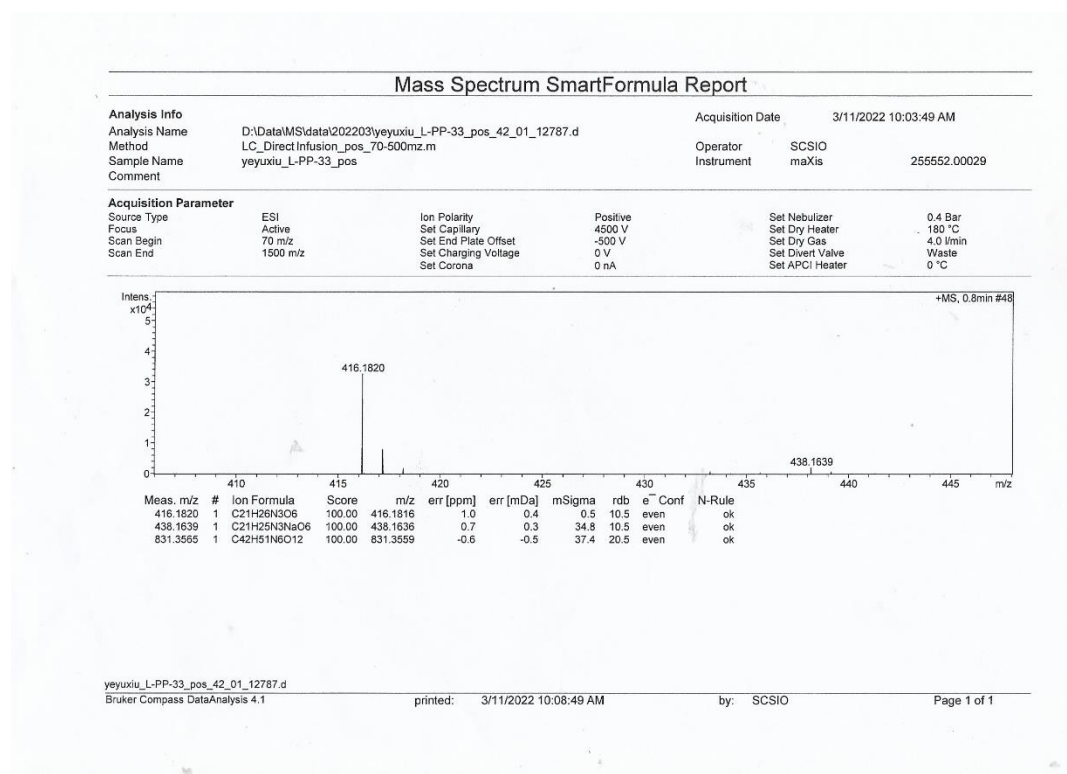

**Figure S15.** The HRESIMS spectrum of compound 2 in DMSO.

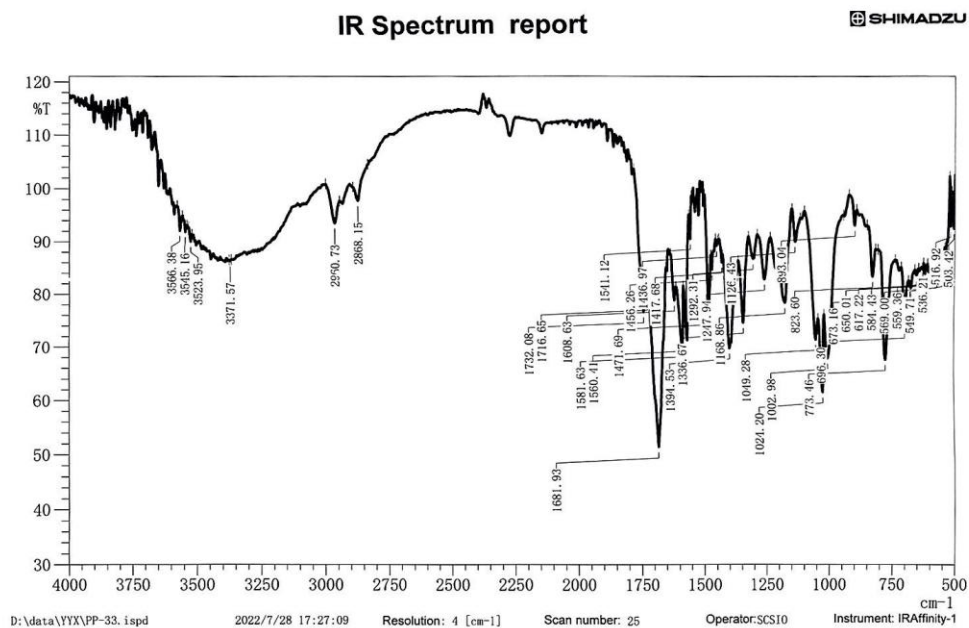

**Figure S16. The IR spectrum of compound 2 in DMSO.**

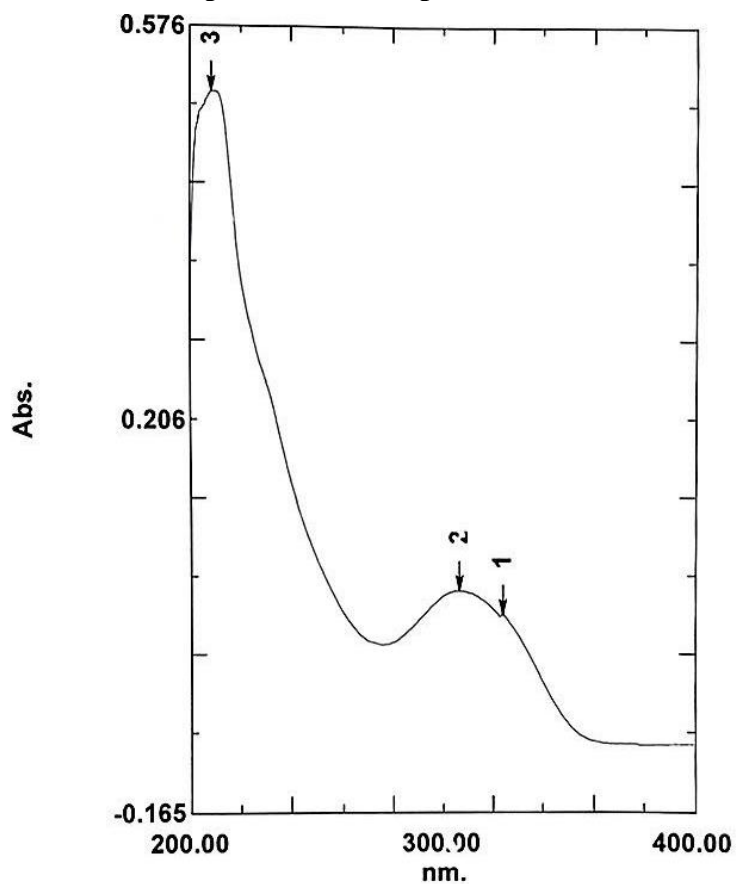

**Figure S17. The UV spectrum of compound 2 in DMSO.**

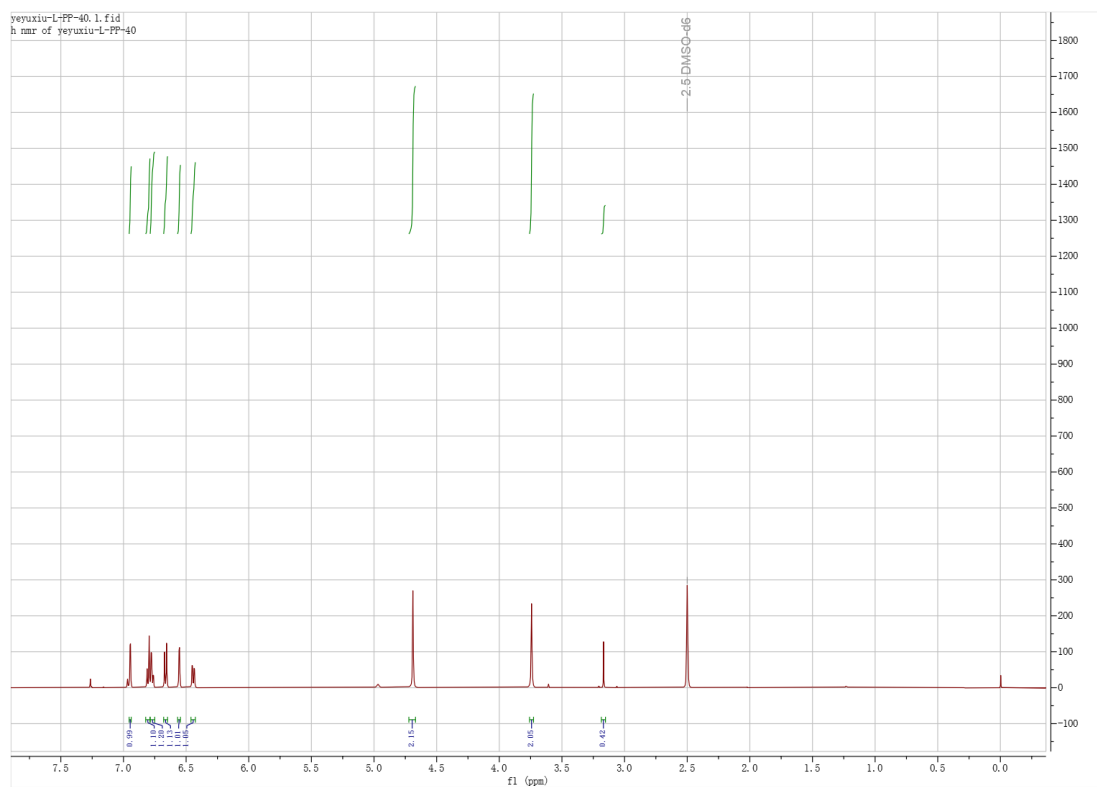

**Figure S18.** The  $^1\text{H}$  NMR spectrum of compound 11 in DMSO.

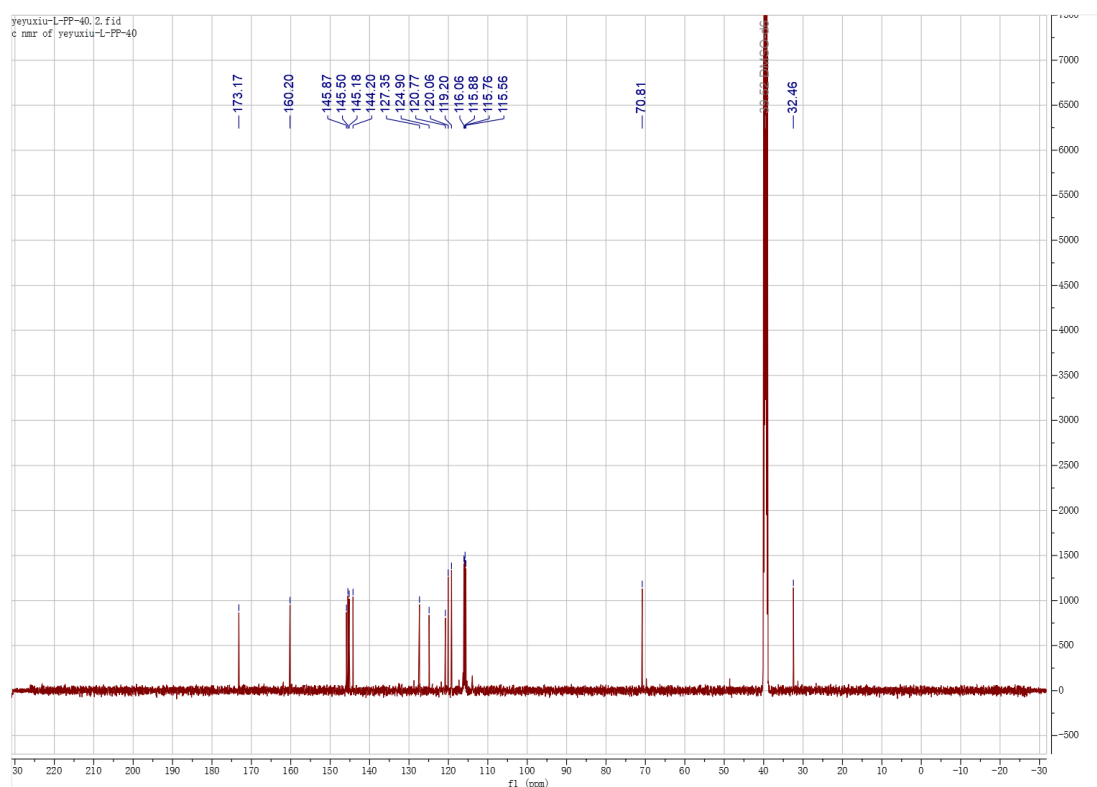

**Figure S19.** The  $^{13}\text{C}$  NMR spectrum of compound 11 in DMSO.

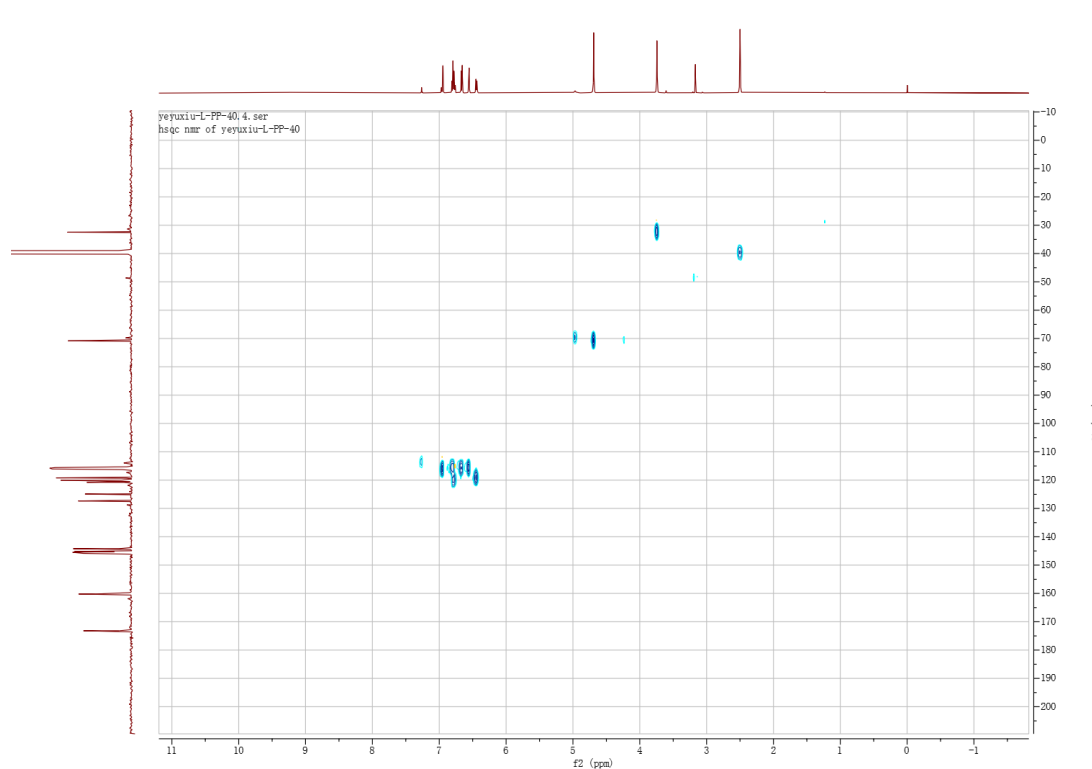

**Figure S20. The HSQC spectrum of compound 11 in DMSO.**

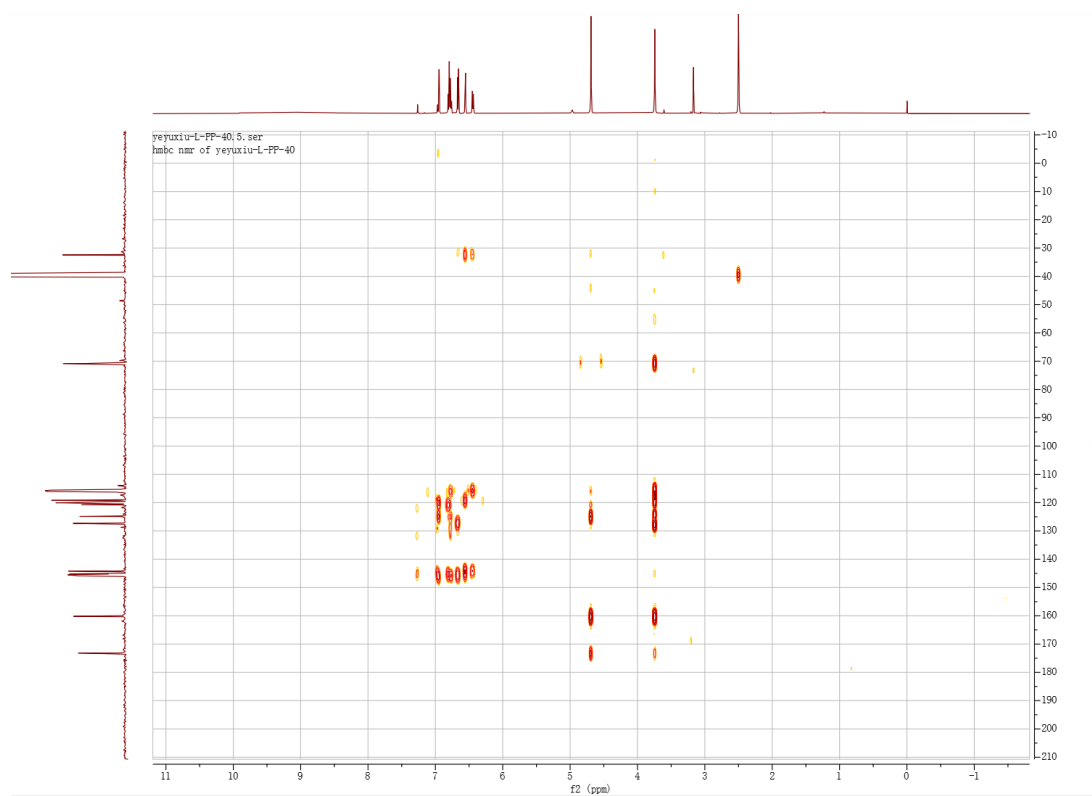

**Figure S21. The HMBC spectrum of compound 11 in DMSO.**

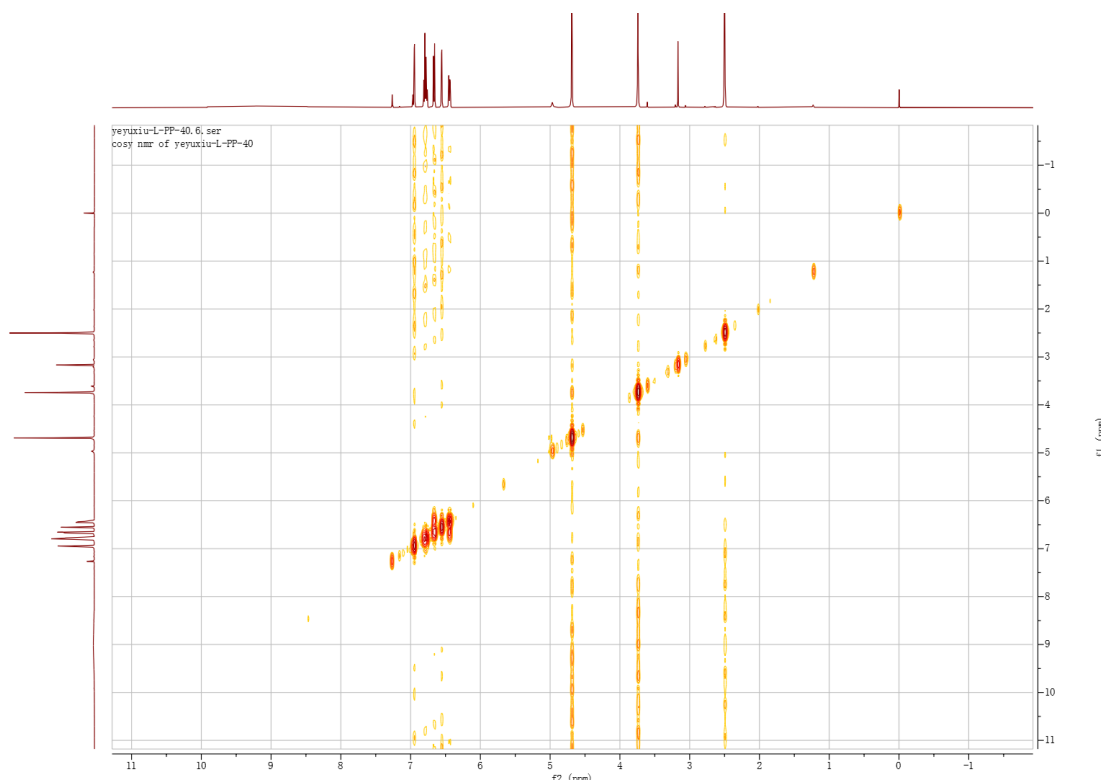

**Figure S22.** The  $^1\text{H}$ - $^1\text{H}$  COSY spectrum of compound 11 in DMSO.

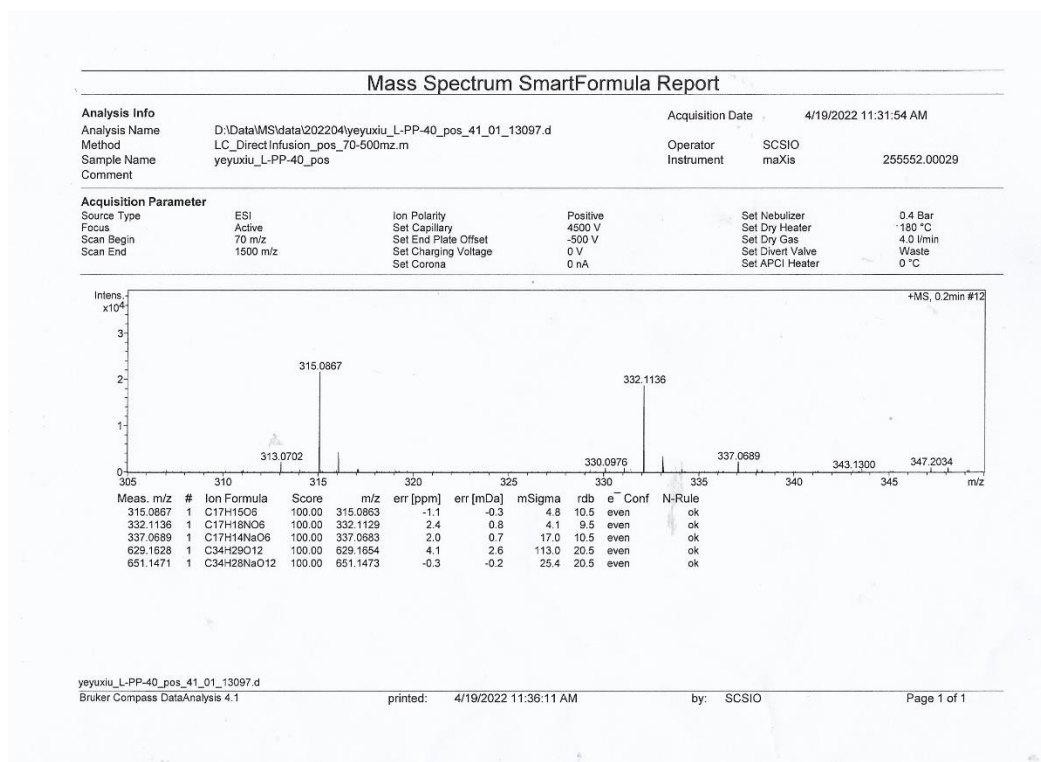

**Figure S23.** The HRMS spectrum of compound 11 in DMSO.

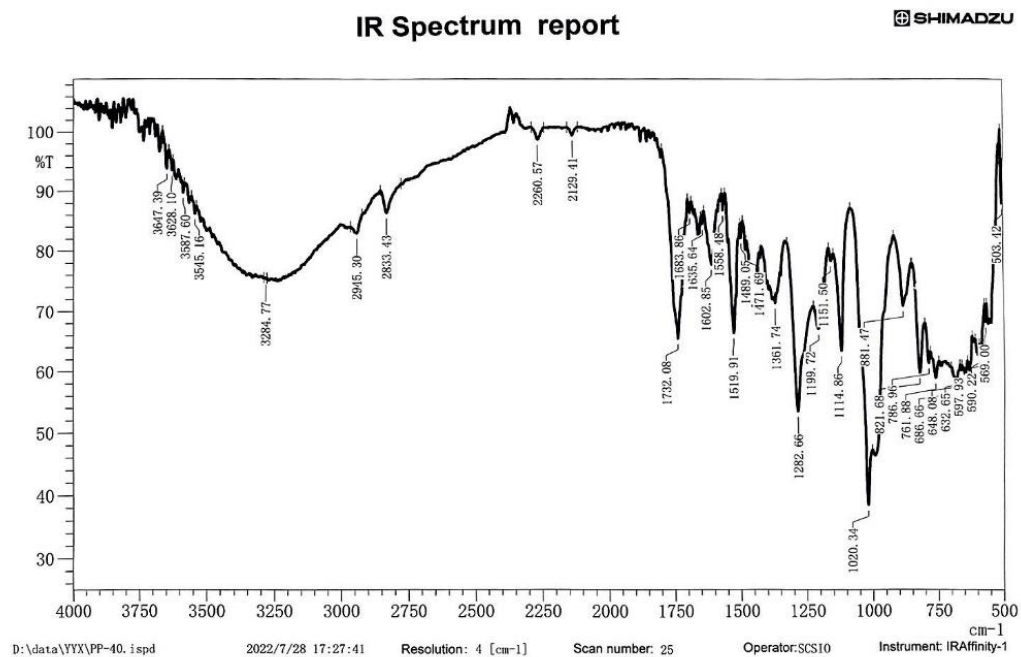

**Figure S24.** The IR spectrum of compound 11 in DMSO.

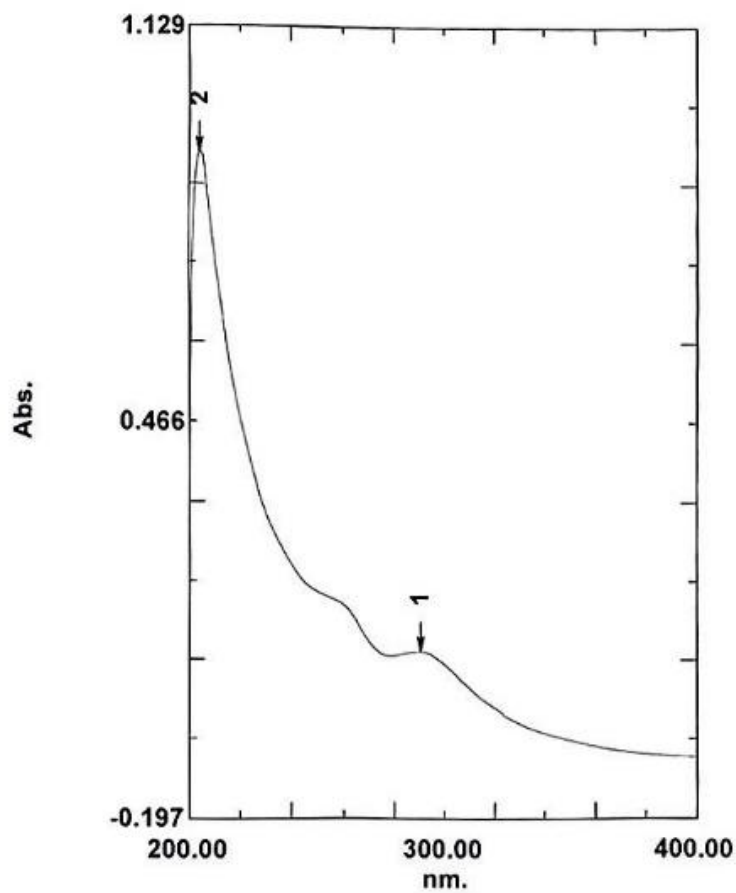

**Figure S25.** The UV spectrum of compound 11 in DMSO.

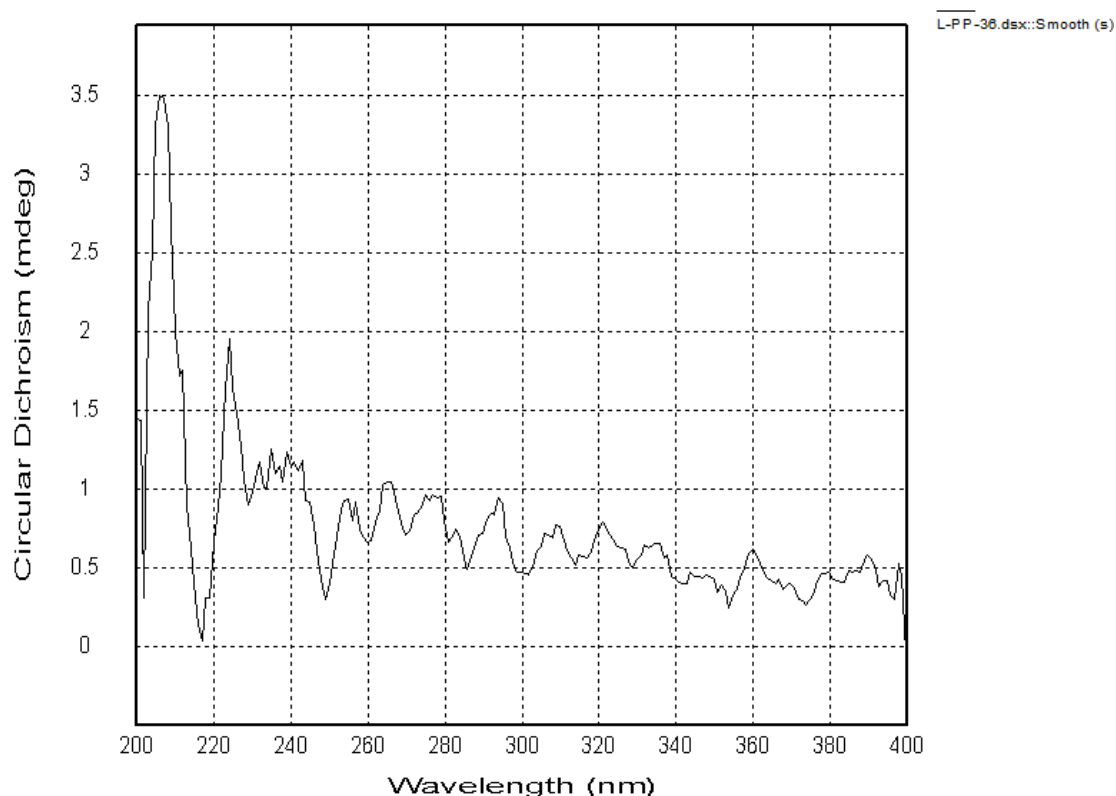

**Figure S26. The experimental ECD spectrum of compound 12 in DMSO.**

### The physicochemical data of the known compounds 3~10 and 12~16

polonimide B (**3**): white oil;  $[\alpha]_D^{25}$  -5.42 (c 0.04, MeOH),  $^1\text{H}$  NMR (500 MHz,  $\text{DMSO}-d_6$ )  $\delta_{\text{H}}$  10.49 (1H, s, H-2), 8.16 (1H, dd,  $J = 8.0, 1.5$  Hz, H-10), 7.86 (1H, ddd,  $J = 8.5, 7.1, 1.6$  Hz, H-8), 7.65 (1H, d,  $J = 8.1$  Hz, H-7), 7.57 (1H, t,  $J = 7.6$  Hz, H-9), 7.26 (1H, s, 17-NH<sub>2</sub>), 6.71 (1H, s, 17-NH<sub>2</sub>), 5.54 (1H, d,  $J = 9.8$  Hz, H-18), 5.12 (1H, t,  $J = 6.6$  Hz, H-14), 3.76 (1H, d,  $J = 9.8, 6.6$  Hz, H-19), 2.18-2.07 (1H, m, H-16), 1.20 (3H, d,  $J = 6.6$  Hz, H-21), 1.02 (3H, d,  $J = 6.6$  Hz, H-20).  $^{13}\text{C}$  NMR (126 MHz,  $\text{DMSO}-d_6$ )  $\delta_{\text{C}}$  172.5 (C-17, C), 165.5 (C-1, C), 159.7 (C-12, C), 146.8 (C-6, C), 144.8 (C-4, C), 134.7 (C-8, CH), 131.0 (C-18, CH), 127.5 (C-7, CH), 127.3 (C-9, CH), 126.3 (C-10, CH), 124.8 (C-3, C), 119.8 (C-11, C), 54.7 (C-14, C), 30.9 (C-16, CH<sub>2</sub>), 28.0 (C-15, CH<sub>2</sub>), 26.5 (C-19, CH), 23.2 (C-20, CH<sub>3</sub>), 22.4 (C-21, CH<sub>3</sub>).

Polonimide A (**4**): yellow oil;  $[\alpha]_D^{25}$  -33.37 (c 0.1, MeOH),  $^1\text{H}$  NMR (500 MHz,  $\text{CDCl}_3$ )  $\delta_{\text{H}}$  8.26 (1H, dd,  $J = 8.1, 1.5$  Hz, H-10), 7.76 (1H, ddd,  $J = 8.5, 7.0, 1.5$  Hz, H-8), 7.69 (1H, d,  $J = 7.7$  Hz, H-7), 7.50-7.42 (1H, m, H-9), 6.49 (1H, d,  $J = 10.1$  Hz, H-18), 5.51 (1H, t,  $J = 6.8$  Hz, H-14), 3.57 (3H, s, 17-OCH<sub>3</sub>), 2.83 (1H, q,  $J = 10.0, 8.2$  Hz, H-19), 2.54 (2H, dd,  $J = 8.7, 6.7$  Hz, H-16),



2.31-2.26 (2H, m, H-15), 1.21 (3H, d,  $J = 6.5$  Hz, H-21), 1.19 (3H, d,  $J = 6.4$  Hz, H-20).  $^{13}\text{C}$  NMR (126 MHz,  $\text{CDCl}_3$ )  $\delta_{\text{C}}$  172.4 (C-17, C), 166.5 (C-1, C), 160.7 (C-12, C), 147.5 (C-6, C), 144.6 (C-4, C), 134.9 (C-8, CH), 128.0 (C-18, CH), 127.7 (C-9, CH), 127.1 (C-3, C), 127.0 (C-7, CH), 124.7 (C-10, CH), 120.2 (C-11, C), 54.7 (C-14, CH), 51.9 (17-OCH<sub>3</sub>, CH<sub>3</sub>), 30.1 (C-16, CH<sub>2</sub>), 28.5 (C-15, CH<sub>2</sub>), 26.3 (C-19, CH), 22.5 (C-21, CH<sub>3</sub>), 22.4 (C-20, CH<sub>3</sub>).

aurantioid C (**5**): white powder;  $[\alpha]_{\text{D}}^{25}$  -16.6 (c 0.1, MeOH),  $^1\text{H}$  NMR (500 MHz,  $\text{CDCl}_3$ )  $\delta_{\text{H}}$  8.25 (1H, d,  $J = 8.0$  Hz, H-10), 7.78 (2H, d,  $J = 7.6$  Hz, H-7, H-8), 7.49 (1H, t,  $J = 7.1$  Hz, H-9), 6.53 (1H, d,  $J = 9.9$  Hz, H-18), 5.49 (1H, s, H-14), 2.70 (1H, s, H-19), 2.47 (2H, s, H-16), 2.24 (2H, s, H-15), 1.21 (6H, d,  $J = 6.2$  Hz, H-20, H-21).  $^{13}\text{C}$  NMR (126 MHz,  $\text{CDCl}_3$ )  $\delta_{\text{C}}$  174.2 (C-17, C), 166.6 (C-1, C), 160.9 (C-12, C), 147.5 (C-6, C), 144.8 (C-4, C), 134.9 (C-9, C), 128.4 (C-18, CH), 128.4 (C-7, CH), 127.6 (C-9, CH), 127.0 (C-10, CH), 126.9 (C-3, C), 120.0 (C-11, C), 54.8 (C-14, CH), 31.8 (C-16, CH<sub>2</sub>), 29.0 (C-15, CH<sub>2</sub>), 26.2 (C-19, CH), 22.5 (C-20, CH<sub>3</sub>), 22.4 (C-21, CH<sub>3</sub>).

fructigenine A (**6**): white powder;  $[\alpha]_{\text{D}}^{25}$  -31.4 (c 0.1, MeOH),  $^1\text{H}$  NMR (500 MHz,  $\text{DMSO}-d_6$ )  $\delta_{\text{H}}$  8.20 (1H, s, 2-NH), 7.84 (1H, d,  $J = 8.1$  Hz, H-7), 7.38 (1H, dd,  $J = 7.7, 1.3$  Hz, H-8), 7.31 – 7.22 (6H, m, H-10, 14, 15, 16, 17, 18), 7.13 (1H, d,  $J = 7.5, 1.1$  Hz, H-9), 5.92 (1H, s, H-5a), 5.64 (1H, dd,  $J = 17.3, 10.8$  Hz, H-20), 5.06-5.01 (2H, m, H-21), 4.44 (1H, t,  $J = 4.6$  Hz, H-13), 3.60-3.53 (1H, m, H-11), 3.12 (1H, dd,  $J = 14.0, 4.3$  Hz, Ha-12), 3.01 (1H, dd,  $J = 14.1, 5.1$  Hz, Hb-12), 2.55 (3H, s, H<sub>3</sub>-23), 2.32 (1H, dd,  $J = 12.3, 5.3$  Hz, Ha-11), 1.61 (1H, t,  $J = 12.0$  Hz, Hb-11), 0.94 (3H, s, H<sub>3</sub>-19a), 0.79 (3H, s, H<sub>3</sub>-19b).  $^{13}\text{C}$  NMR (126 MHz,  $\text{DMSO}-d_6$ )  $\delta_{\text{C}}$  169.5 (C-22, C), 166.6 (C-4, C), 165.2 (C-1, C), 143.4 (C-7a, C), 143.2 (C-20, C), 136.6 (C-13, C), 132.5 (C-10a, C), 130.0 (C-15, 17, CH), 128.4 (C-8, CH), 128.1 (C-14, 18, CH), 126.5 (C-16, CH), 124.9 (C-10, CH), 124.1 (C-7, CH), 117.7 (C-9, CH), 114.1 (C-21, CH<sub>2</sub>), 78.6 (C-5a, CH), 60.5 (C-10b, CH), 58.5 (C-11b, CH), 55.5 (C-3, CH), 40.1 (C-19, C), 36.3 (C-11, CH<sub>2</sub>), 36.0 (C-12, CH<sub>2</sub>), 23.7 (C-19b, CH<sub>3</sub>), 22.9 (C-19a, CH<sub>3</sub>), 22.1 (C-23, CH<sub>3</sub>).

3-O-methylviridicatin (**7**): white powder;  $^1\text{H}$  NMR (500 MHz, Chloroform- $d$ )  $\delta_{\text{H}}$  7.53 (2H, t,  $J = 7.2$  Hz, H-2', 6'), 7.48 (1H, d,  $J = 7.2$  Hz, H-4'), 7.43 (2H, m, H-7, 8), 7.37 (2H, d,  $J = 7.2$  Hz, H-3', 5'), 7.23 (1H, d,  $J = 8.0$  Hz, H-5), 7.11 (1H, m, H-6), 3.83 (3H, s, 3-OCH<sub>3</sub>).  $^{13}\text{C}$  NMR (126 MHz,  $\text{DMSO}$ )  $\delta_{\text{C}}$  158.5 (C-2, C), 145.1 (C-3, C), 137.4 (C-4, CH), 135.8 (C-8a, C), 133.5 (C-1', C),

129.1 (C-2', CH), 129.1 (C-6', CH) 128.6 (C-7, CH), 128.4 (C-3', CH), 128.4 (C-5', CH), 128.0 (C-4', CH), 125.7 (C-5, CH), 122.0 (C-6, CH), 119.8 (C-4a, C), 115.1 (C-8, C), 59.4 (3-OCH<sub>3</sub>, CH<sub>3</sub>).

viridicatol (**8**): yellow powder; <sup>1</sup>H NMR (500 MHz, DMSO-*d*<sub>6</sub>)  $\delta_{\text{H}}$  12.19 (1H, s, 2-OH), 9.52 (1H, s, 3-OH), 9.14 (1H, s, 3'-OH), 7.35-7.27 (3H, m, H-8,5,2'), 7.13-7.04 (2H, m, H-6, 7), 6.85-6.79 (1H, m, H-4), 6.74-6.69 (2H, m, H-5',6'). <sup>13</sup>C NMR (126 MHz, DMSO)  $\delta_{\text{C}}$  158.3 (C-2, C), 157.3 (C-3', C), 142.3 (C-3, C), 134.9 (C-4, C), 133.1 (C-9, C), 129.4 (C-2', CH), 126.4 (C-5, CH), 124.4 (C-7, CH), 124.0 (C-1', C), 122.1 (C-6, CH), 120.9 (C-10, C), 120.4 (C-5', CH), 116.7 (C-6', CH), 115.2 (C-8, CH), 114.6 (C-4', CH).

arctosin (**9**): yellow oil; <sup>1</sup>H NMR (500 MHz, DMSO-*d*<sub>6</sub>)  $\delta_{\text{H}}$  7.53 (1H, ddd, *J* = 8.4, 7.5, 1.7 Hz, H-8), 7.15 (1H, dd, *J* = 8.4, 1.1 Hz, H-9), 7.09 (1H, td, *J* = 7.5, 1.1 Hz, H-7), 7.02-6.98 (1H, m, H-6), 6.96 (1H, d, *J* = 7.9 Hz, H-15), 6.69-6.65 (1H, m, H-14), 6.11 (1H, t, *J* = 2.0 Hz, H-12), 6.02-5.98 (1H, m, H-16), 4.23 (1H, s, H-10), 3.06 (3H, s, 4-CH<sub>3</sub>). <sup>13</sup>C NMR (126 MHz, DMSO-*d*<sub>6</sub>)  $\delta_{\text{C}}$  166.0 (C-2, C), 165.4 (C-5, C), 157.0 (C-13, C), 135.1 (C-9a, C), 132.4 (C-8, CH), 132.3 (C-11, C), 130.5 (C-6, CH), 128.9 (C-15, CH), 126.5 (C-5a, C), 124.2 (C-7, CH), 121.1 (C-9, CH), 116.9 (C-16, CH), 115.7 (C-14, CH), 112.8 (C-12, CH), 70.1 (C-3, C), 63.7 (C-10, C), 30.9 (4-CH<sub>3</sub>, CH<sub>3</sub>).

cyclopenin (**10**): yellow oil; [ $\alpha$ ]<sub>D</sub><sup>25</sup> -60.1 (c 0.05, MeOH), <sup>1</sup>H NMR (500 MHz, DMSO-*d*<sub>6</sub>)  $\delta_{\text{H}}$  10.84 (1H, s, -NH), 7.54 (1H, ddd, *J* = 8.4, 7.7, 1.6 Hz, H-8), 7.32-7.28 (1H, m, H-14), 7.22 (2H, t, *J* = 7.7 Hz, H-13, 15), 7.16 (1H, dd, *J* = 8.4, 1.1 Hz, H-9), 7.09 (1H, td, *J* = 7.7, 1.1 Hz, H-7), 6.92 (1H, dd, *J* = 7.7, 1.6 Hz, H-6), 6.66-6.61 (2H, m, H-12, 16), 4.36 (1H, s, H-10), 3.32 (3H, s, 4-CH<sub>3</sub>). <sup>13</sup>C NMR (126 MHz, DMSO-*d*<sub>6</sub>)  $\delta_{\text{C}}$  165.9 (C-2, C), 165.3 (C-5, C), 135.2 (C-9a, C), 132.4 (C-8, CH), 131.0 (C-11, C), 130.5 (C-9, CH), 128.7 (C-14, CH), 127.9 (C-13, CH), 127.9 (C-15, CH), 126.4 (C-5a, C), 126.1 (C-12, CH), 126.1 (C-16, CH), 124.2 (C-7, CH), 121.1 (C-6, CH), 70.1 (C-3, C), 63.7 (C-10, CH), 30.8 (4-CH<sub>3</sub>, CH<sub>3</sub>).

8-Hydroxyhelvafuranone (**12**): green oil; [ $\alpha$ ]<sub>D</sub><sup>25</sup> + 3.07 (c 0.05, MeOH), <sup>1</sup>H NMR (500 MHz, DMSO-*d*<sub>6</sub>)  $\delta_{\text{H}}$  9.33 (1H, s, 8-OH), 9.22 (1H, s, 9-OH), 9.15 (1H, s, 16-OH), 7.80 (1H, d, *J* = 8.3 Hz, 5-OH), 6.99 (2H, d, *J* = 8.1 Hz, H-14, 18), 6.93 (1H, d, *J* = 2.0 Hz, H-7), 6.80 (1H, d, *J* = 8.1 Hz, H-10), 6.76 (1H, dd, *J* = 8.2, 2.0 Hz, H-11), 6.70 (2H, d, *J* = 8.2 Hz, H-15, 17), 5.78 (1H, d, *J* = 7.7 Hz, H-5), 3.85 (1H, d, *J* = 15.1 Hz, H-12), 3.58 (1H, d, *J* = 15.1 Hz, H-12). <sup>13</sup>C NMR (126 MHz, DMSO-*d*<sub>6</sub>)  $\delta_{\text{C}}$  170.6 (C-2, C), 157.7 (C-4, C), 156.1 (C-16, C), 146.1 (C-9, C), 145.1 (C-8,

C), 129.6 (C-14, 18, CH), 127.8 (C-6, C), 126.5 (C-13, C), 120.3 (C-3, C), 120.2 (C-11, CH), 116.1 (C-7, CH), 115.6 (C-10, CH), 115.5 (C-15, 17, CH), 96.5 (C-5, CH), 31.0 (C-12, CH<sub>2</sub>).

verrucosidinol acetate (**13**): white oil;  $[\alpha]_D^{25} +9.7$  (c 0.03, MeOH), <sup>1</sup>H NMR (500 MHz, DMSO-*d*<sub>6</sub>)  $\delta_H$  5.75 (1H, d, *J* = 3.2 Hz, H-9), 5.69 (1H, s, H-7), 5.38 (1H, s, H-11), 3.96 (1H, d, *J* = 6.9, 3.2 Hz, H-15), 3.74 (3H, t, *J* = 4.2 Hz, H-24), 3.55 (1H, d, *J* = 3.2 Hz, H-13), 2.17 (3H, t, *J* = 4.2 Hz, H-25), 2.00 (3H, d, *J* = 3.2 Hz, H-17), 1.89 (3H, d, *J* = 3.4 Hz, H-16), 1.78 (3H, d, *J* = 3.0 Hz, H-20), 1.73 (3H, d, *J* = 3.0 Hz, H-19), 1.44 (3H, d, *J* = 3.2 Hz, H-18), 1.38 (3H, d, *J* = 3.2 Hz, H-22), 1.23 (3H, d, *J* = 3.1 Hz, H-21), 1.05 (3H, dd, *J* = 7.2, 3.1 Hz, H-23). <sup>13</sup>C NMR (126 MHz, DMSO)  $\delta_C$  169.2 (C-26, C), 168.4 (C-3, C), 163.6 (C-1, C), 158.4 (C-5, C), 133.8 (C-9, CH), 133.7 (C-10, C), 132.8 (C-11, CH), 130.9 (C-8, C), 111.6 (C-4, C), 109.3 (C-2, C), 81.6 (C-7, CH), 79.3 (C-12, C), 77.5 (C-6, C), 75.8 (C-15, CH), 66.9 (C-13, CH), 66.3 (C-14, C), 60.2 (C-24, C), 23.3 (C-18, CH<sub>3</sub>), 21.9 (C-21, CH<sub>3</sub>), 20.8 (C-25, CH<sub>3</sub>), 18.6 (C-23, CH<sub>3</sub>), 18.1 (C-22, CH<sub>3</sub>), 15.1 (C-19, CH<sub>3</sub>), 13.5 (C-22, CH<sub>3</sub>), 9.9 (C-16, CH<sub>3</sub>), 9.8 (C-17, CH<sub>3</sub>).

deoxyverrucosidin (**14**): yellow oil;  $[\alpha]_D^{25} -0.1$  (c 0.1, MeOH), <sup>1</sup>H NMR (500 MHz, CDCl<sub>3</sub>)  $\delta_H$  6.15 (1H, s, H-7), 5.79 (1H, s, H-9), 5.36 (1H, s, H-11), 4.10 (1H, q, *J* = 6.8 Hz, H-15), 3.81 (3H, s, H-18), 3.40 (1H, s, H-13), 2.07 (3H, s, H-17), 2.00 (3H, d, *J* = 1.5 Hz, H-21), 1.86 (3H, d, *J* = 1.5 Hz, H-22), 1.82 (3H, s, H-19), 1.66 (3H, d, *J* = 1.4 Hz, H-20), 1.15 (3H, d, *J* = 6.8 Hz, H-16). <sup>13</sup>C NMR (126 MHz, CDCl<sub>3</sub>)  $\delta_C$  168.2 (C-3, C), 166.1 (C-1, C), 156.9 (C-5, C), 137.9 (C-7, CH), 136.9 (C-9, CH), 135.1 (C-8, C), 133.6 (C-11, CH), 132.6 (C-10, C), 126.6 (C-6, C), 110.2 (C-2, C-4, 2C), 80.2 (C-12, C), 76.5 (C-15, CH), 67.6 (C-13, CH), 67.4 (C-14, C), 60.4 (C-18, CH<sub>3</sub>), 23.4 (C-23, CH<sub>3</sub>), 22.0 (C-16, CH<sub>3</sub>), 19.0 (C-21, CH<sub>3</sub>), 18.6 (C-22, CH<sub>3</sub>), 16.4 (C-20, CH<sub>3</sub>), 13.9 (C-24, CH<sub>3</sub>), 10.9 (C-19, CH<sub>3</sub>), 10.5 (C-17, CH<sub>3</sub>).

nordeoxyverrucosidin (**15**): yellow oil;  $[\alpha]_D^{25} +2.7$  (c 0.1, MeOH), <sup>1</sup>H NMR (500 MHz, CDCl<sub>3</sub>)  $\delta$  6.07 (1H, s, H-7), 5.86 (1H, s, H-9), 5.51 (1H, d, *J* = 1.5 Hz, H-11), 5.48 (1H, s, H-2), 4.14 (1H, q, *J* = 6.8 Hz, H-15), 3.83 (3H, s, 3-OCH<sub>3</sub>), 3.44 (1H, s, H-13), 2.07 (3H, d, *J* = 1.5 Hz, 6-CH<sub>3</sub>), 1.96 (9H, dd, *J* = 3.6, 2.1 Hz, 4-CH<sub>3</sub>, 8-CH<sub>3</sub>, 10-CH<sub>3</sub>), 1.48 (3H, s, 14-CH<sub>3</sub>), 1.43 (3H, s, 12-CH<sub>3</sub>), 1.21 (3H, d, *J* = 6.8 Hz, 15-CH<sub>3</sub>). <sup>13</sup>C NMR (126 MHz, CDCl<sub>3</sub>)  $\delta_C$  171.5 (C-3, C), 164.4, (C-1, C) 161.5 (C-5, C), 139.4 (C-7, CH), 136.5 (C-9, CH), 135.1 (C-8, C), 133.6 (C-11, CH), 132.1 (C-10, C), 127.5 (C-6, C), 106.8 (C-4, C), 88.3 (C-2, CH), 80.3 (C-12, C), 76.9 (C-15, CH), 67.6 (C-13, CH),

67.6 (C-14, C), 56.3 (3-OCH<sub>3</sub>, CH<sub>3</sub>), 22.0 (12-CH<sub>3</sub>, CH<sub>3</sub>), 19.0 (15-CH<sub>3</sub>, CH<sub>3</sub>), 18.7 (10-CH<sub>3</sub>, CH<sub>3</sub>), 18.6 (8-CH<sub>3</sub>, CH<sub>3</sub>), 16.7 (6-CH<sub>3</sub>, CH<sub>3</sub>), 14.0 (14-CH<sub>3</sub>, CH<sub>3</sub>), 11.2 (4-CH<sub>3</sub>, CH<sub>3</sub>).

aspterric acid methyl ester (**16**): yellow oil;  $[\alpha]_D^{25}$  -9.23 (c 0.1, MeOH) <sup>1</sup>H NMR (500 MHz, Chloroform-d)  $\delta_H$  4.17 (1H, d,  $J$  = 8.4 Hz, H-2), 3.79 (3H, s, H-16), 3.37 (1H, d,  $J$  = 8.2 Hz, H-13a), 2.46-2.40 (1H, m, H-13b), 2.37-2.32 (2H, m, H-4), 2.28 (1H, d,  $J$  = 8.3 Hz, H-6), 2.18 (1H, dd,  $J$  = 13.2, 8.4 Hz, H-1a), 2.04 (1H, d,  $J$  = 13.3 Hz, 8.4 Hz, H-1b), 2.01 (1H, d,  $J$  = 5.5 Hz, H-9a), 1.84-1.76 (1H, m, H-5a), 1.74 (3H, s, H-14), 1.70 (1H, d,  $J$  = 8.3 Hz, H-5b), 1.60 (3H, s, H-15), 1.47 (1H, d,  $J$  = 5.5 Hz, H-9b), 1.18 (1H, dt,  $J$  = 14.0, 6.6 Hz, H-8a), 1.03 (1H, d,  $J$  = 14.0, 6.6 Hz, H-8b). <sup>13</sup>C NMR (126 MHz, Chloroform-d)  $\delta_C$  176.2 (C-12, C), 135.5 (C-10, C), 124.6 (C-11, C), 84.9 (C-2, CH), 78.6 (C-3, C), 76.2 (C-13, CH<sub>2</sub>), 55.7 (C-6, CH), 53.1 (C-7, C), 52.6 (C-16, CH<sub>3</sub>), 36.3 (C-1, CH<sub>2</sub>), 34.4 (C-4, CH<sub>2</sub>), 33.4 (C-8, CH<sub>2</sub>), 32.4 (C-9, CH<sub>2</sub>), 23.7 (C-5, CH<sub>2</sub>), 23.5 (C-15, CH<sub>3</sub>), 21.0 (C-14, CH<sub>3</sub>).
